## Correction

# Correction: Numerical Magnitude Affects Temporal Memories but Not Time Encoding

The *PLOS ONE* Staff

The corresponding author's email address is incorrect. The correct email address is: zhenguangcai@gmail.com

Figure 1 is incorrect. The authors have provided a corrected version here.

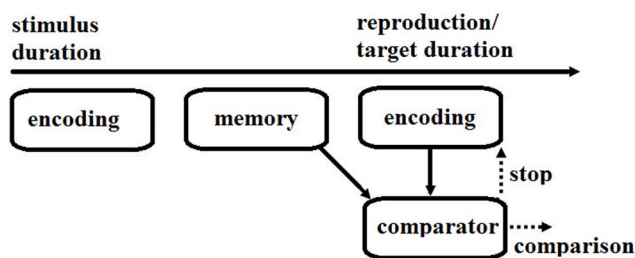

**Figure 1. Cognitive processes involved in time perception.** First, a stimulus duration is encoded and then kept in memory. Next, the comparator retrieves the remembered duration with which the newly encoded duration (i.e., the duration being reproduced in a reproduction task or a target duration in a comparison task) is compared. The comparator stops the reproduction when the reproduced duration is similar enough to the remembered duration, or makes a comparison judgment based on the relative amounts of time between the remembered duration and the target duration in a comparison task. doi:10.1371/journal.pone.0083159.g001

## Reference

1. Cai ZG, Wang R (2014) Numerical Magnitude Affects Temporal Memories but Not Time Encoding. *PLoS ONE* 9(1): e83159. doi:10.1371/journal.pone.0083159

**Citation:** The *PLOS ONE* Staff (2014) Correction: Numerical Magnitude Affects Temporal Memories but Not Time Encoding. *PLoS ONE* 9(5): e96885. doi:10.1371/journal.pone.0096885

**Published** May 1, 2014

**Copyright:** © 2014 The *PLOS ONE* Staff. This is an open-access article distributed under the terms of the Creative Commons Attribution License, which permits unrestricted use, distribution, and reproduction in any medium, provided the original author and source are credited.
